# Supplementary material
Source: ML conference proceedings conference paper supplement (https://openaccess.thecvf.com/content/CVPR2026/html/Tang_Coordinate_Denoising_for_CVPR_2026_paper.html)
Supplement: Supplementary file 1 [file Tang_Coordinate_Denoising_for_CVPR_2026_supplemental.pdf]

# Coordinate Denoising for Non-Equilibrium Molecular Representation Learning

## Supplementary Material

### 7. Proof of Equivalence between Score Matching and Conditional Score Matching

The following proposition establishes the equivalence between score matching and conditional score matching, which is a key theoretical foundation for denoising approach [44].

**Proposition 1.** *The equivalence between score matching and conditional score matching. The two minimization objectives below are equivalent, i.e.,  $J_1(\theta) \approx J_2(\theta)$ ,*

$$J_1(\theta) = E_{p(\tilde{x})}[\|GNN_{\theta}(\tilde{x}) - \nabla_{\tilde{x}} \log p(\tilde{x})\|^2] \quad (19)$$

$$J_2(\theta) = E_{p(\tilde{x}|x)p(x)}[\|GNN_{\theta}(\tilde{x}) - \nabla_{\tilde{x}} \log p(\tilde{x}|x)\|^2] \quad (20)$$

*Proof.* We first expand the square term in  $J_1(\theta)$  and observe:

$$J_1(\theta) = E_{p(\tilde{x})}[\|GNN_{\theta}(\tilde{x})\|^2 - 2E_{p(\tilde{x})}[(GNN_{\theta}(\tilde{x}), \nabla_{\tilde{x}} \log p(\tilde{x}))] + T_3, \quad (21)$$

$$J_2(\theta) = E_{p(\tilde{x}|x)p(x)}[\|GNN_{\theta}(\tilde{x})\|^2 - 2E_{p(\tilde{x})p(x)}[(GNN_{\theta}(\tilde{x}), \nabla_{\tilde{x}} \log p(\tilde{x}|x))] + T_4, \quad (22)$$

where  $T_3, T_4$  are constants independent of  $\theta$ . Therefore, it suffices to show that the middle terms on the right-hand side are equal:

$$\begin{aligned} & E_{p(\tilde{x})}[\langle GNN_{\theta}(\tilde{x}), \nabla_{\tilde{x}} \log p(\tilde{x}) \rangle] \\ &= \int_{\tilde{x}} p(\tilde{x}) \langle GNN_{\theta}(\tilde{x}), \nabla_{\tilde{x}} \log p(\tilde{x}) \rangle d\tilde{x} \\ &= \int_{\tilde{x}} p(\tilde{x}) \left\langle GNN_{\theta}(\tilde{x}), \frac{\nabla_{\tilde{x}} p(\tilde{x})}{p(\tilde{x})} \right\rangle d\tilde{x} \\ &= \int_{\tilde{x}} \langle GNN_{\theta}(\tilde{x}), \nabla_{\tilde{x}} p(\tilde{x}) \rangle d\tilde{x} \\ &= \int_{\tilde{x}} \left\langle GNN_{\theta}(\tilde{x}), \nabla_{\tilde{x}} \left( \int_x p(\tilde{x}|x)p(x) dx \right) \right\rangle d\tilde{x} \\ &= \int_{\tilde{x}} \left\langle GNN_{\theta}(\tilde{x}), \int_x p(x) \nabla_{\tilde{x}} p(\tilde{x}|x) dx \right\rangle d\tilde{x} \\ &= \int_{\tilde{x}} \left\langle GNN_{\theta}(\tilde{x}), \int_x p(\tilde{x}|x)p(x) \nabla_{\tilde{x}} \log p(\tilde{x}|x) dx \right\rangle d\tilde{x} \\ &= \int_{\tilde{x}} \int p(\tilde{x}|x)p(x) \langle GNN_{\theta}(\tilde{x}), \nabla_{\tilde{x}} \log p(\tilde{x}|x) \rangle dx d\tilde{x} \\ &= E_{p(\tilde{x},x)}[(GNN_{\theta}(\tilde{x}), \nabla_{\tilde{x}} \log p(\tilde{x}|x))], \end{aligned}$$

which is equal to the second term in  $J_2(\theta)$ , completing the proof.  $\square$

### 8. Comparison with Prior Denoising Approaches

Coordinate denoising represents an innovative approach in molecular force field prediction, leveraging the three-dimensional coordinate information of molecules. By incorporating physicochemical theoretical constraints, it achieves superior outcomes compared to methods relying solely on property prediction.

Godwin et al. [18] were the pioneers in proposing the addition of noise to 3D coordinates, subsequently employing denoising as an auxiliary task. This auxiliary task is trained concurrently with the primary task, eliminating the need for an additional large dataset. However, their method is constrained to known equilibrium structures, limiting its applicability to datasets such as QM9 and OC20 IS2RE [7, 33, 34], and rendering it unsuitable for force prediction tasks, such as those on the MD17 dataset [8, 9, 36]. In contrast, our study introduces force encoding to extend their framework, enabling its application to non-equilibrium structures. These structures constitute a significantly larger dataset compared to equilibrium ones, and our approach demonstrates enhanced performance on force field prediction datasets.

Zaidi et al. [48] adopted the denoising strategy proposed by Godwin et al. as a pre-training technique, necessitating an additional large dataset of unlabeled equilibrium structures for pre-training. Conversely, both Godwin et al. and our work integrate denoising directly with the primary task, avoiding the use of any supplementary unlabeled data.

Feng et al. [11] built upon the pre-training denoising methodology of Zaidi et al., introducing a distinct noise addition strategy. Specifically, they differentiate noise into dihedral angle noise and coordinate noise, focusing solely on predicting the latter. However, adding noise to dihedral angles requires tools like RDKit to identify rotatable bonds, which restricts its applicability to datasets such as OC20.

Furthermore, the aforementioned studies initially pre-train their models on the PCQM4Mv2 dataset [30] before fine-tuning on datasets like MD17. It should be noted that their experimental setup differs from ours, as we do not employ any dataset for pre-training purposes.

### 9. Experimental Setup

The hyperparameter settings for our experiments are presented in Table 7 and Table 8. For the components of the original task, excluding the auxiliary task, we largely align our configurations with those of the Frad method to facilitate a fair comparison.

Table 7. Hyperparameters for fine-tuning on the MD17 dataset.

| Parameter                  | Setting                     |
|----------------------------|-----------------------------|
| Train/Val/Test Splitting   | 950/50/remaining data       |
| Batch size                 | 8                           |
| Optimizer                  | AdamW                       |
| Warm up steps              | 1000                        |
| Max Learning rate          | 0.001                       |
| Learning rate decay policy | ReduceLROnPlateau scheduler |
| Learning rate factor       | 0.8                         |
| Patience                   | 30                          |
| Min learning rate          | 1.00E-07                    |
| Network structure          | TorchMD-NET                 |
| Head number                | 8                           |
| Layer number               | 6                           |
| RBF number                 | 32                          |
| Activation function        | SiLU                        |
| Embedding dimension        | 128                         |
| Force weight               | 30                          |
| Energy weight              | 1                           |
| Denoising weight           | 1                           |
| Coordinate noise scale     | 0.05                        |

Table 8. Hyperparameters for fine-tuning on the QM9 dataset.

| Parameter                  | Setting                     |
|----------------------------|-----------------------------|
| Train/Val/Test Splitting   | 110000/10000/remaining data |
| Batch size                 | 128                         |
| Optimizer                  | AdamW                       |
| Warm up steps              | 10000                       |
| Max Learning rate          | 0.0004                      |
| Learning rate decay policy | Cosine                      |
| Learning rate factor       | 0.8                         |
| Cosine cycle length        | 300000                      |
| Network structure          | TorchMD-NET                 |
| Head number                | 8                           |
| Layer number               | 8                           |
| RBF number                 | 64                          |
| Activation function        | SiLU                        |
| Embedding dimension        | 256                         |
| Head                       | 256                         |
| AtomRef                    | 1                           |
| Label weight               | 1                           |
| Noisy Nodes denoise weight | 0.5                         |
| Coordinate noise scale     | 0.01                        |

cept in the literature [3]. Denoising autoencoders [45], for instance, have been developed as a robust strategy to extract meaningful and resilient representations by interpreting the denoising process as a mechanism to capture the underlying data manifold. In the context of graph neural networks (GNNs) [18], the incorporation of noisy inputs during training has been shown to yield performance improvements. Notably, the Noisy Nodes approach employs denoising as an auxiliary loss to mitigate the issue of over-smoothing, thereby facilitating more accurate predictions of molecular properties.

Score matching, on the other hand, serves as an energy-based generative modeling technique designed to perform maximum likelihood estimation for unnormalized probability density models, particularly when the partition function is computationally intractable. A significant theoretical connection exists between denoising and score matching, especially when the noise follows a standard Gaussian distribution [44]. This relationship has been effectively leveraged in generative modeling and energy-based molecular modeling, particularly for learning force fields [40]. Despite sharing a common theoretical foundation, generative models and force field learning diverge in their practical assumptions and objectives, reflecting their distinct goals in application.

## 10. Denoising and Score Matching: A Theoretical Perspective

The application of noise to enhance the generalization capabilities of neural networks has been a well-established con-
